# Supplementary material for: The OBS UK Dashboard: an interactive tool for representative trial site selection to facilitate equality and diversity in maternity research
Source: Springer Nature journal article supplement (doi:10.1186/s13063-024-08487-x), 2024-09-27

0% 10% 20% 30% 40% 50% 60% 70% 80% 90% 100%

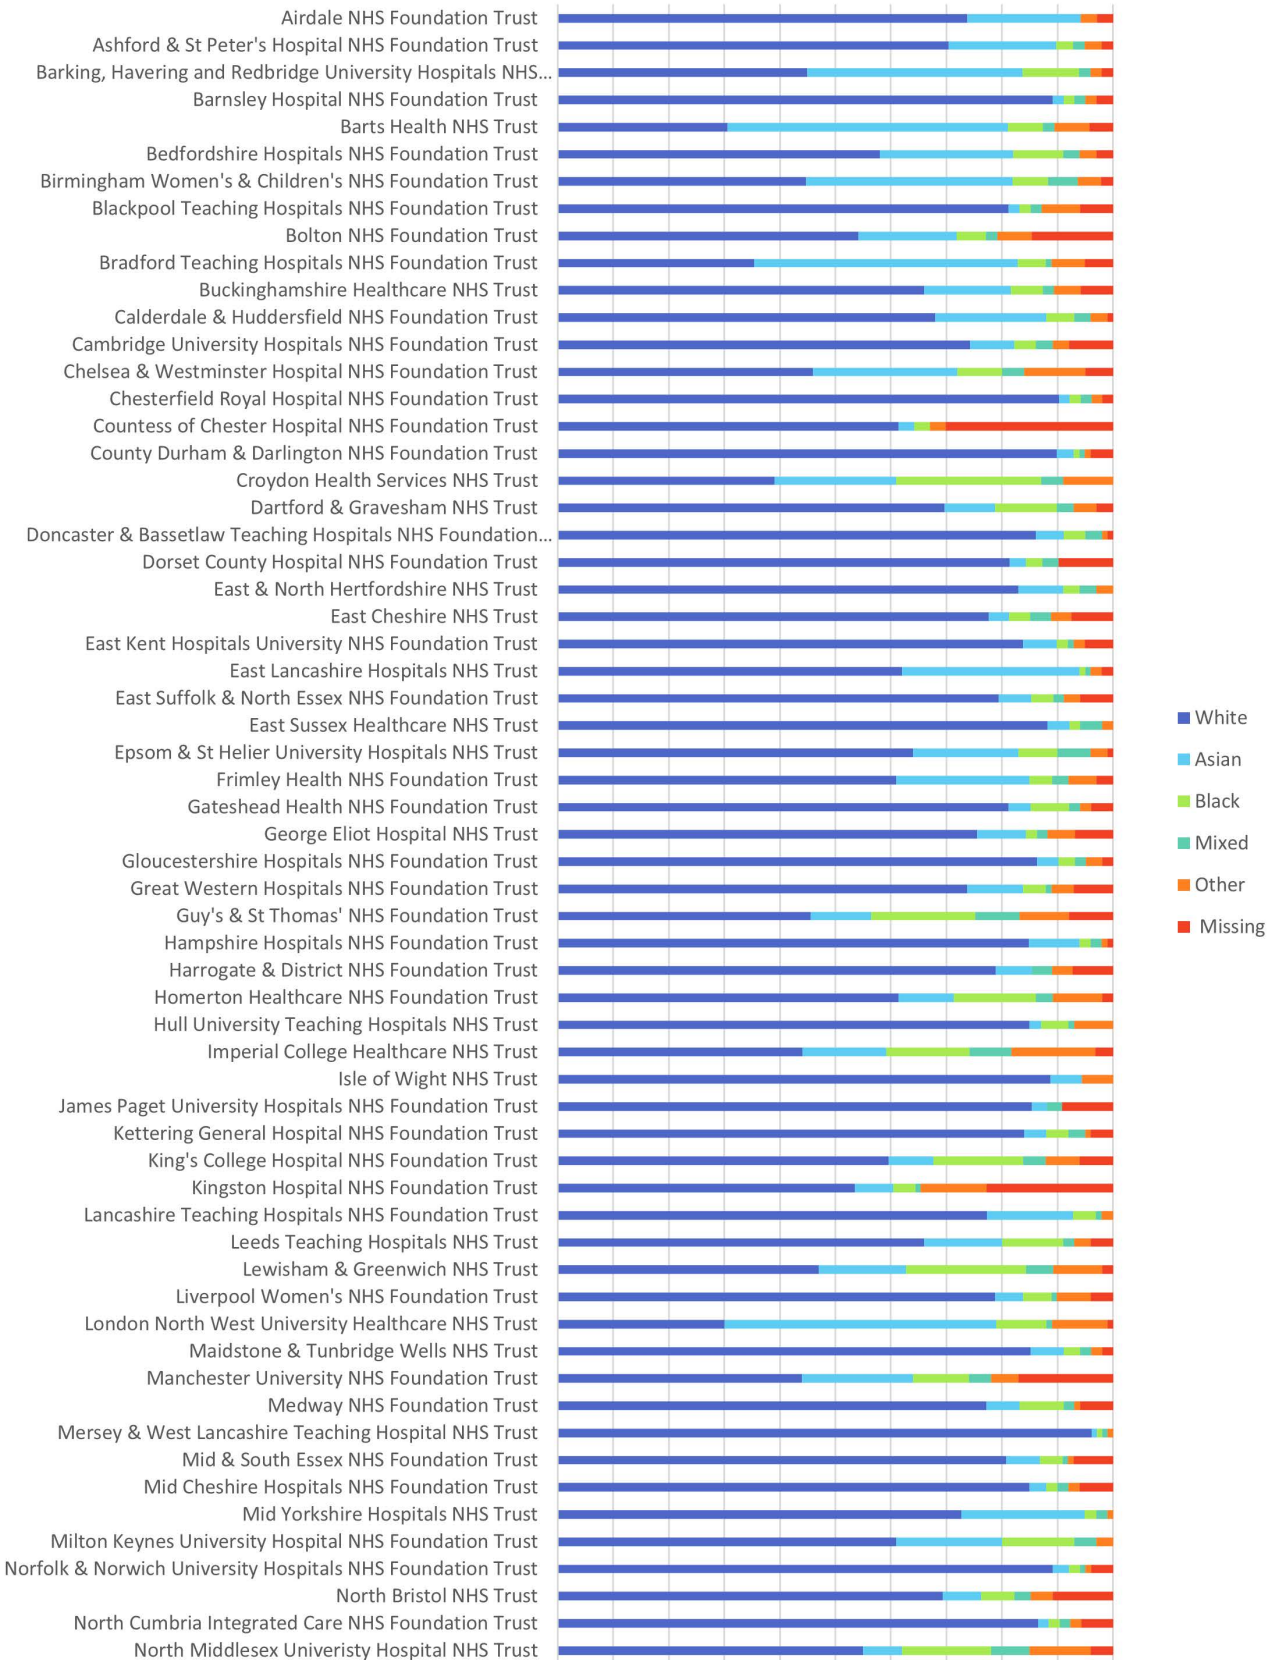

0% 10% 20% 30% 40% 50% 60% 70% 80% 90% 100%

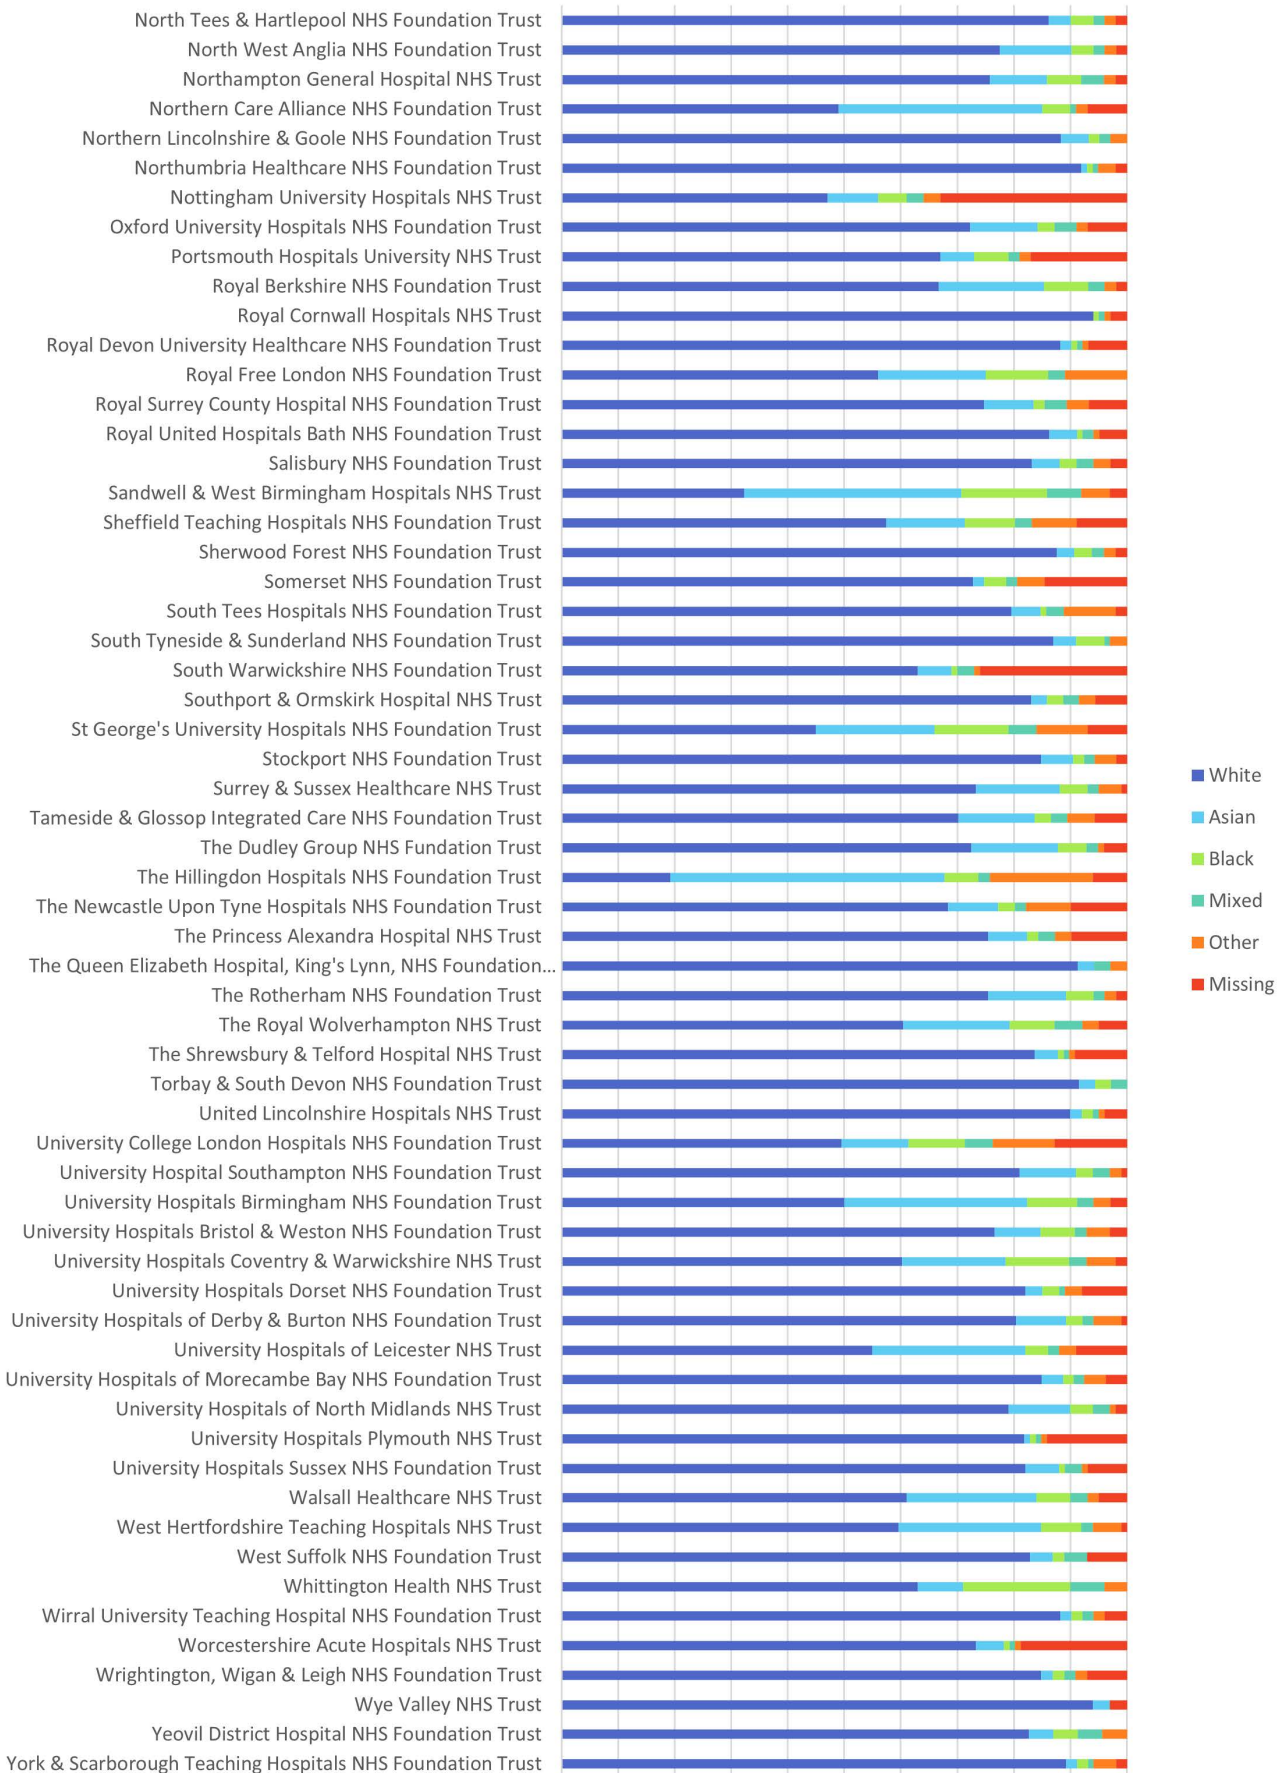

Supplement: MOESM1 [file 13063_2024_8487_MOESM1_ESM.pdf]
